# Supplementary material for: UBL3 Interaction with α-Synuclein Is Downregulated by Silencing MGST3
Source: MDPI journal article supplement (doi:10.3390/biomedicines11092491), 2023-09-08
Supplement: s1 [file s1]

Supplemental Table S1

The list of siRNAs used in the current study

| siRNA targeting | siRNA ID* | Sense 5'- 3'                | Antisense 5'- 3'            |
|-----------------|-----------|-----------------------------|-----------------------------|
| <i>QSOX1</i>    | s224485   | CCU GCA CUC CGU GAA UGA Att | UUC AUU CAC GGA GUG CAG Gaa |
|                 | s11505    | GGA UUC UUU GCG AGA AAU Att | UAU UUC UCG CAA AGA AUC Cat |
| <i>QSOX2</i>    | s46761    | GAA UAU UCC UUA CUA AUC Att | UGA UUA GUA AGG AAU AUU Cca |
|                 | s46763    | GAG GUG AUC UUA GAC CUG Att | UCA GGU CUA AGA UCA CCU Ccc |
| <i>HTATIP2</i>  | s230128   | CGA CGA GGA AGC UUA UAA Att | UUU AUA AGC UUC CUC GUC Gaa |
|                 | s230129   | AGA GUG CUC UUA AAG GAA Att | UUU CCU UUA AGA GCA CUC Ugc |
| <i>UBE3C</i>    | s18661    | CAG GGU CUA UGG UAC CGU Utt | AAC GGU ACC AUA GAC CCU Gtg |
|                 | s18660    | GAG ACA CUU UUG CGA AGU Att | UAC UUC GCA AAA GUG UCU Cgt |
| <i>COPS5</i>    | s21627    | GCA AUC GGG UGG UAU CAU Att | UAU GAU ACC ACC CGA UUG Cat |
|                 | s21629    | GGA UUG AUG UUA GUA CUC Att | UGA GUA CUA ACA UCA AUC Cca |
| <i>MGST3</i>    | s8762     | AGA ACA CGU UGG AAG UGU Att | UAC ACU UCC AAC GUG UUC Ugg |
|                 | s8764     | GAC GAG UUC UUU AUG CUU Att | UAA GCA UAA AGA ACU CGU Cca |
| <i>NSF</i>      | s181      | GUU ACA UUA UGA ACG GUA Utt | AUA CCG UUC AUA AUG UAA Ctt |
|                 | s182      | GGC AGA CUU UCU ACA UGC Att | UGC AUG UAG AAA GUC UGC Ctt |
| <i>HECTD1</i>   | s24575    | GGC UCG AGA UUU AUA CGA Utt | AUC GUA UAA AUC UCG AGC Cat |
|                 | s24576    | CAG UUG CGU UAA UUC GAA Att | UUU CGA AUU AAC GCA ACU Gct |
| <i>SAE1</i>     | s19551    | GUU CCG UAC AGA UAA AGG Att | UCC UUU AUC UGU ACG GAA Ctt |
|                 | s19552    | GCU GGA UCA CGA ACA GGU Att | UAC CUG UUC GUG AUC CAG Cat |
| <i>ATG3</i>     | s34731    | GAA UAA CGG AAG CCG UUA Att | UUA ACG GCU UCC GUU AUU Cct |
|                 | s34733    | GCG GAU GGG UAG AUA CAU Att | UAU GUA UCU ACC CAU CCG Cca |

\*Silencer Select (Ambion, Life Technologies)
